# Supplementary material for: Transcriptomic Analysis of the Early Strobilar Development of Echinococcus granulosus
Source: MDPI journal article supplement (doi:10.3390/pathogens9060465), 2020-06-12
Supplement: s1 [file s1]

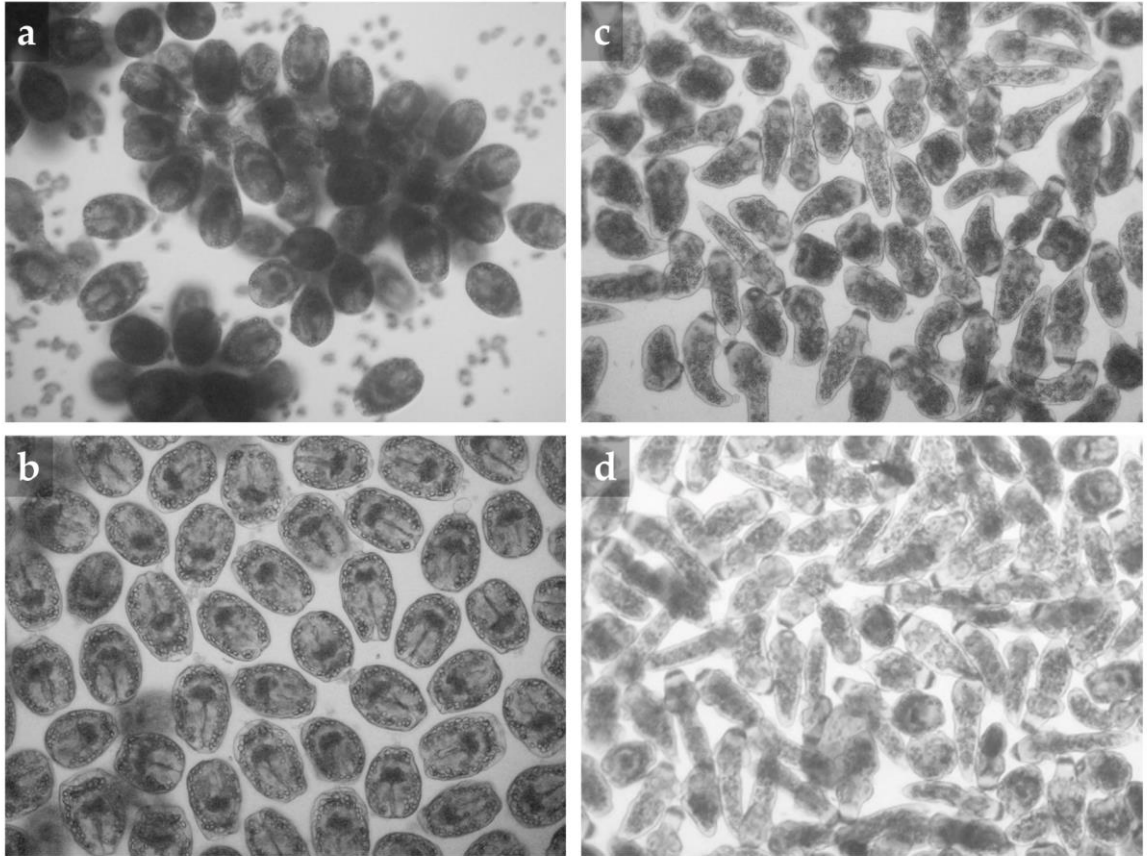

**Figure S1.** Induction of strobilar development in *E. granulosus* protoscoleces. (a) Protoscoleces washed with phosphate-buffered saline and (b) after pepsin treatment. (c) Protoscoleces after 12 and (d) 24 hours in complete biphasic medium. Magnification 100x.
